# Supplementary material
Source: publisher figshare collection journal article supplement (https://sage.figshare.com/ndownloader/files/12453497)
Supplement: Supplementary file 1 [file 12453497]

## Supplementary 1

| Applications                                                                                                                                                            | Target Deficit                                                          |
|-------------------------------------------------------------------------------------------------------------------------------------------------------------------------|-------------------------------------------------------------------------|
| Constant Therapy                                                                                                                                                        | Language and/or cognitive-communication.                                |
| Tactus Therapy Solutions Ltd. Language Therapy 4-in-1 Therapy Toolkit                                                                                                   | Language deficits.                                                      |
| Tactus Therapy Solutions Ltd. Question Therapy 2-in-1: Asking and Answering Questions                                                                                   | Language and/or cognitive-communication deficits.                       |
| Tactus Therapy Solutions Ltd. Category Therapy                                                                                                                          | Language and/or cognitive-communication deficits.                       |
| Tactus Therapy Solutions Ltd. Conversation Therapy Gets People Talking                                                                                                  | Language and/or cognitive-communication deficits.                       |
| Lingraphica SmallTalk Oral Motor Exercises                                                                                                                              | Motor speech deficits                                                   |
| Multimedia Speech Pathology Speech Sounds on Cue for iPad                                                                                                               | Motor speech deficits                                                   |
| Jay Bacal apps (Mahopac, NY, USA) with the modules Search 4 It, Chain Of Thought, Morphos, Get + Together, BlanketyBlank, Just Saying, RhymieStymie and This Is To That | Language and cognitive-communication deficits.                          |
| Tony Ngo ©OmNom Apps. Anagram Twist                                                                                                                                     | Language and cognitive-communication deficits.                          |
| SUD Inc. Dr Driving                                                                                                                                                     | Perceptual retraining, eye hand coordination.                           |
| EA Chillingo. Parking Mania Free                                                                                                                                        | Perceptual retraining.                                                  |
| Lumate, LLC. Memory Matches 2                                                                                                                                           | Memory.                                                                 |
| Nikita Ptashnik, Tangible Games. Awesome memory                                                                                                                         | Memory.                                                                 |
| Mediocre AB. Smash Hit                                                                                                                                                  | Perceptual retraining and improve reaction time, eye hand coordination. |
| Halfbrick Studios. Fruit Ninja®                                                                                                                                         | Perceptual retraining and reaction time, eye hand coordination.         |
| Hipster Whale Pty Ltd. Crossy Road                                                                                                                                      | Perceptual retraining, improve reaction time and eye hand coordination. |
| Bytewaves Inc. Slide Me Out                                                                                                                                             | Cognition and problem solving.                                          |
| Nexx Crunch Sdn. Bhd. Glow Puzzle                                                                                                                                       | Cognition and problem solving.                                          |
| Big Duck Games LLC. Flow Free                                                                                                                                           | Cognition, problem solving, eye hand coordination.                      |

|                                                                                  |                                                                                      |
|----------------------------------------------------------------------------------|--------------------------------------------------------------------------------------|
| King.com Limited. Candy Crush Saga                                               | Perceptual retraining, cognition, reaction time and improving eye hand coordination. |
| Tactus Therapy Solutions Ltd. Visual Attention Therapy Lite - Cognitive Training | Perceptual retraining for neglect.                                                   |
| MyFirstApp Ltd. Series 1, Sort It Out 1, Sort It Out 2, My Mosaic 2              | Cognition and Perceptual retraining.                                                 |
| Outfit7 Limited. Jigty Jigsaw Puzzle                                             | Perceptual retraining.                                                               |
| MobilityWare. Solitaire                                                          | Cognition.                                                                           |
| Mind The Frog, Inc. Sudoku                                                       | Cognition.                                                                           |
| Big Clever Learning Limited. Letter Workbook                                     | Cognition, perception and fine motor.                                                |
| BinaryLabs, Inc. Dexteria Fine Motor                                             | Fine motor, eye hand coordination.                                                   |
| Lawrence Ingraham, TantrumApps. Letter Quiz, Learn your ABCs                     | Cognition, perception, fine motor.                                                   |

## Appendix 1: RecoverNow Engagement Survey

RecoverNow Engagement Survey

Welcome to the RecoveNow Engagement Survey

Thank you for participating in our survey. Your feedback is important.

If you need help to answer this survey, we will help you.

This survey should take you approximately 5 to 15 minutes.

For the first section, you will be asked to rank agreement from 1 - 5, supported by visual scale: strongly agree, somewhat agree, neutral, somewhat disagree, strongly disagree.

The second section will have open ended questions where you can write your comments.

\*Likert Scale designed by Freepik.

## RecoverNow Engagement Survey

### Recruitment/Timing

1. I was given the device at the right time (not too early, not too late).

|                       |                       |                       |                       |                       |
|-----------------------|-----------------------|-----------------------|-----------------------|-----------------------|
| Strongly agree        | Somewhat agree        | Neutral               | Somewhat disagree     | Strongly disagree     |
| <input type="radio"/> |

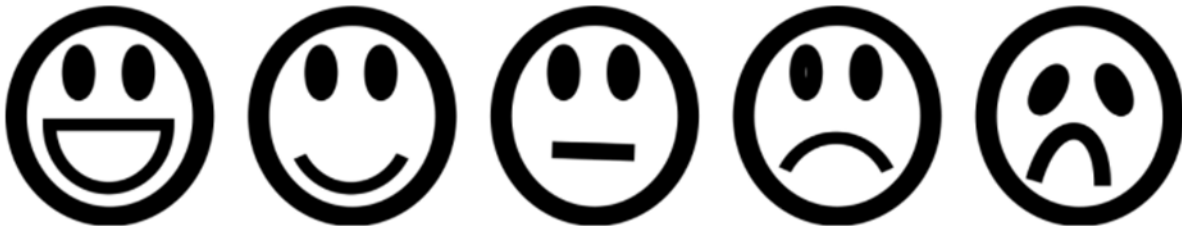

2. I wish I had the device earlier in my hospital stay.

|                       |                       |                       |                       |                       |
|-----------------------|-----------------------|-----------------------|-----------------------|-----------------------|
| Strongly agree        | Somewhat agree        | Neutral               | Somewhat disagree     | Strongly disagree     |
| <input type="radio"/> |

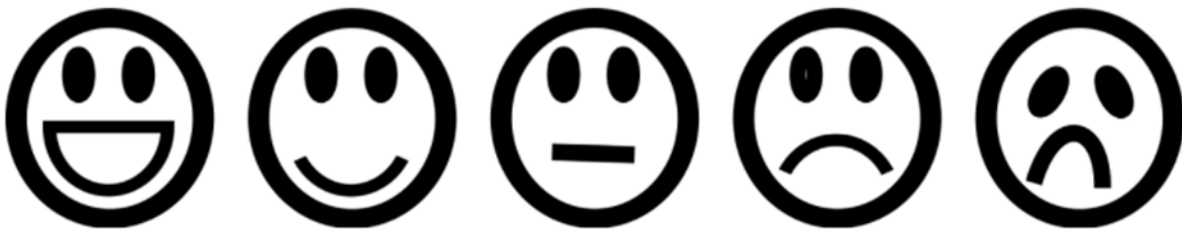

Prev

Next

## RecoverNow Engagement Survey

Device

3. The device case was easy to open.

Strongly agree

Somewhat agree

Neutral

Somewhat disagree

Strongly disagree

☐☐☐☐☐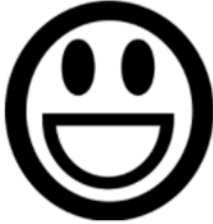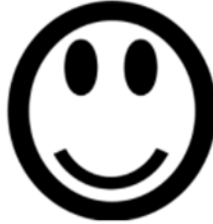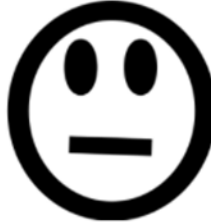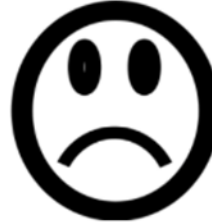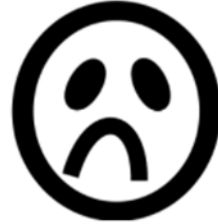

4. The device was easy to turn on and log into.

Strongly agree

Somewhat agree

Neutral

Somewhat disagree

Strongly disagree

☐☐☐☐☐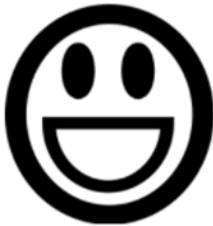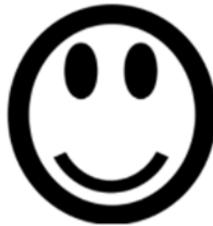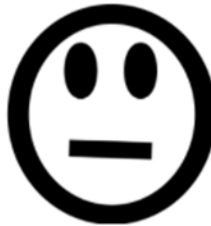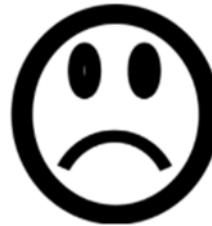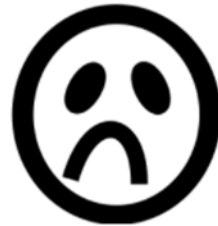

5. I needed my family/friend/caregiver to help me use the device.

Strongly agree

Somewhat agree

Neutral

Somewhat disagree

Strongly disagree

☐☐☐☐☐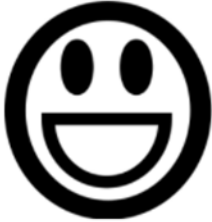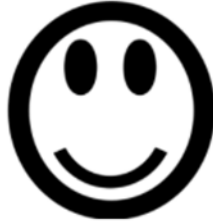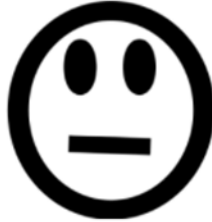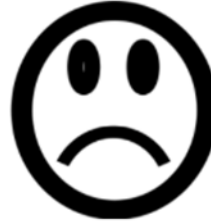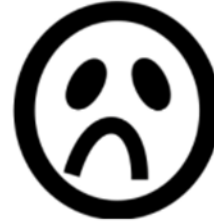

6. I received enough training to use the device.

Strongly agree

Somewhat agree

Neutral

Somewhat disagree

Strongly disagree

☐☐☐☐☐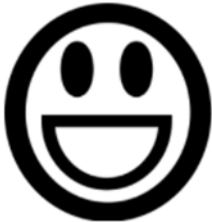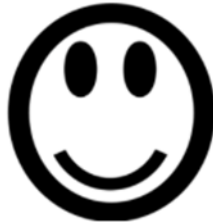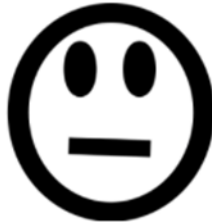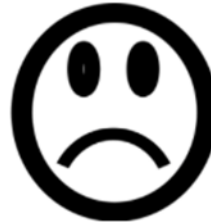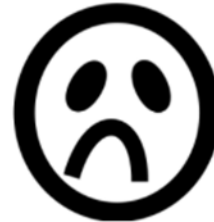

7. The programs were stimulating and helped avoid boredom.

Strongly agree

Somewhat agree

Neutral

Somewhat disagree

Strongly disagree

☐☐☐☐☐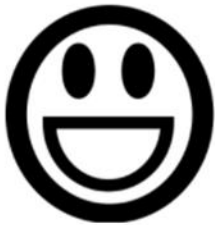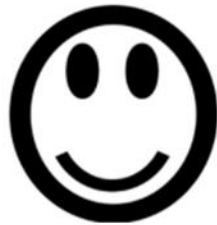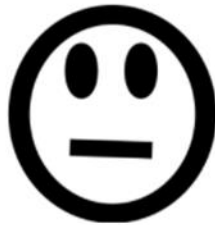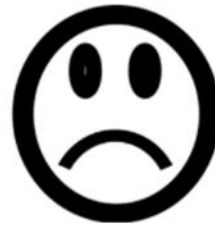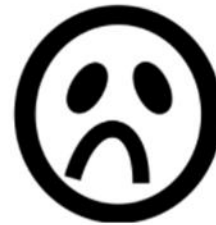

8. The programs helped me to recover.

Strongly agree

Somewhat agree

Neutral

Somewhat disagree

Strongly disagree

☐☐☐☐☐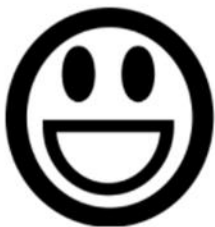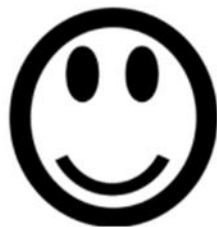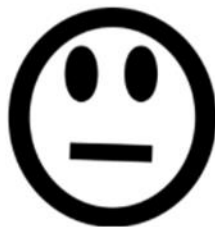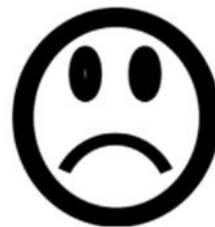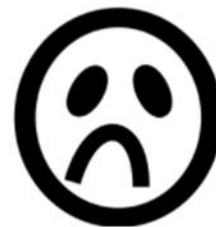

Prev

Next

## RecoverNow Engagement Survey

### Outcome

9. I would like to work more on my speaking, writing, reading and understanding.

Strongly agree

Somewhat agree

Neutral

Somewhat disagree

Strongly disagree

☐☐☐☐☐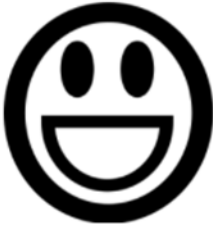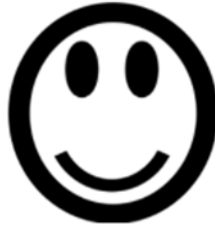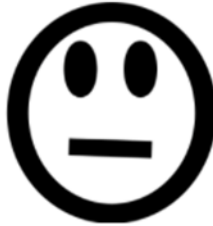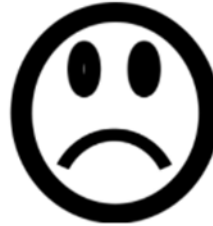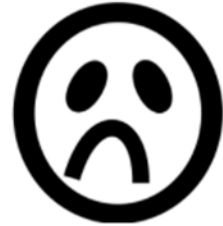

10. I would like to work more on my memory and concentration.

Strongly agree

Somewhat agree

Neutral

Somewhat disagree

Strongly disagree

☐☐☐☐☐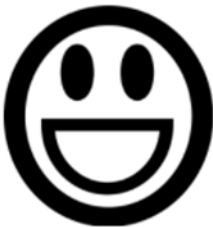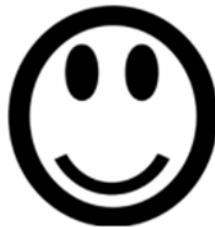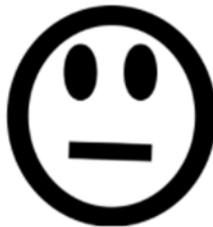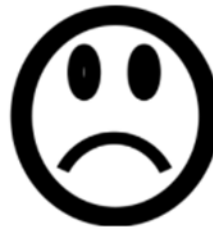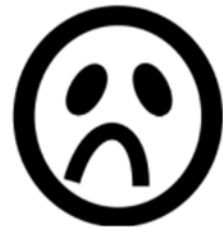

11. I would like to work more on using my arm and hand during activities.

Strongly agree

Somewhat agree

Neutral

Somewhat disagree

Strongly disagree

☐☐☐☐☐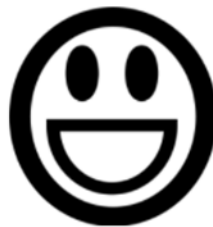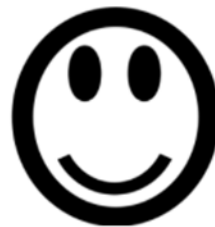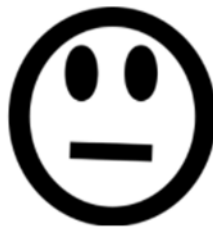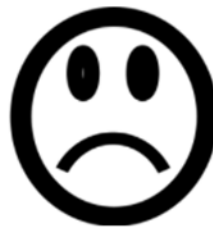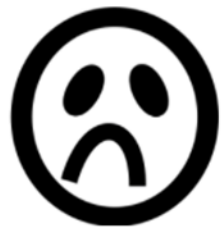

Prev

Next

## RecoverNow Engagement Survey

Length

12. Using the device 1 hour per day was enough.

Strongly agree

Somewhat agree

Neutral

Somewhat disagree

Strongly disagree

☐☐☐☐☐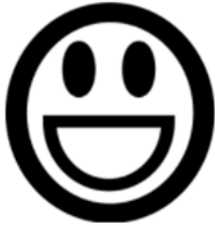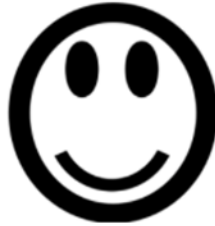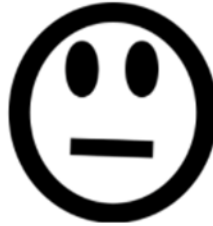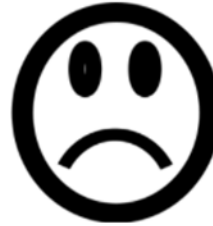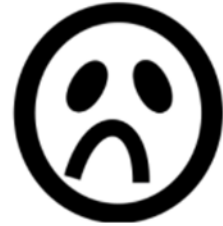

13. I preferred to use the device more than 1 hour per day.

Strongly agree

Somewhat agree

Neutral

Somewhat disagree

Strongly disagree

☐☐☐☐☐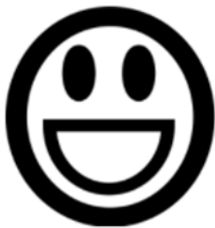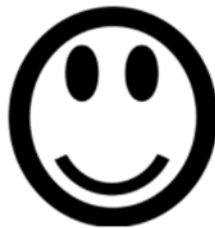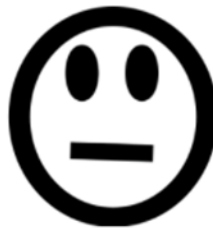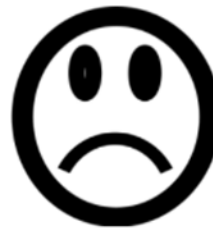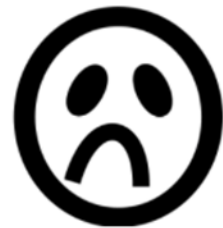



14. I want to use the device even after I leave the hospital.

Strongly agree

Somewhat agree

Neutral

Somewhat disagree

Strongly disagree

☐☐☐☐☐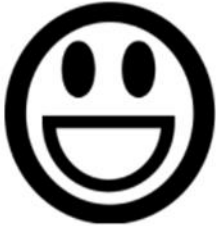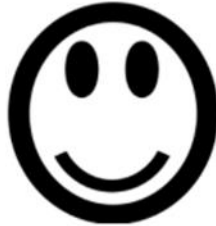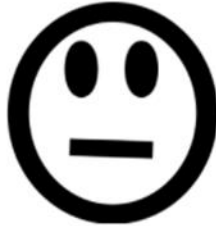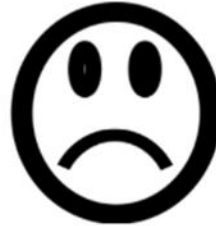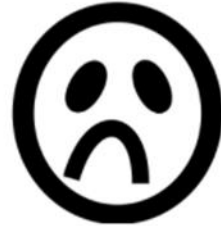

15. I am willing to use the device every day for 8 weeks.

Strongly agree

Somewhat agree

Neutral

Somewhat disagree

Strongly disagree

☐☐☐☐☐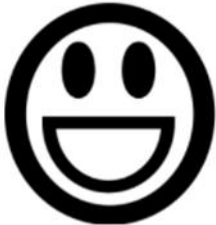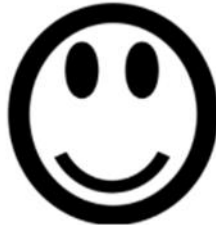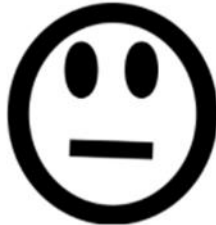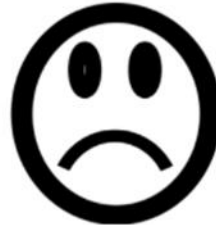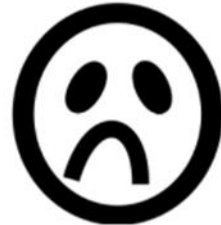

Prev

Next

## RecoverNow Engagement Survey

### Open-ended questions

16. What I liked about the device was:

17. What I didn't like about the device was:

18. It would be nice if the device could:

19. Other:

Prev

Done
